# Supplementary material
Source: ML conference proceedings conference paper supplement (https://openaccess.thecvf.com/content/WACV2023/html/K._Motion_Aware_Self-Supervision_WACV_2023_paper.html)
Supplement: Supplementary file 1 [file K._Motion_Aware_Self-Supervision_WACV_2023_supplemental.pdf]

# Supplementary Materials for Motion Aware Self-Supervision for Generic Event Boundary Detection

Ayush K. Rai, Tarun Krishna, Julia Dietlmeier, Kevin McGuinness\*, Alan F. Smeaton\*, Noel E. O’Connor\*  
Insight SFI Centre for Data Analytics, Dublin City University (DCU)

ayush.ra13@mail.dcu.ie

## 1. Additional Details

### 1.1. Implementation Details

**Stage 2: Finetuning.** Input to the encoder is based on the temporal window  $W = 5$  and stride  $m = 3$ . ( $W, m$ ) can be thought of as hyper-parameter, setting a larger value of each might introduce noise information when two different boundaries lie close to each other, a smaller value might be unable to capture the necessary context information for a boundary. Among the 5 annotations available for Kinetics-GEBD for every video, the ones with highest annotator F1 consistency score is used for fine-tuning.

### 1.2. Architectural Design Choice

Temporal Shift Module (TSM) [3] is inserted in every residual block of ResNet50 encoder. *MotionSqueeze* module is added after the conv3\_x layer of the ResNet50 encoder.

Table 1. Modified ResNet50 Encoder

| Layers    | ResNet-50                                                                                       | Modified ResNet-50                                                                                            | Output size      |
|-----------|-------------------------------------------------------------------------------------------------|---------------------------------------------------------------------------------------------------------------|------------------|
| conv1     | $7 \times 7, 64, \text{stride } 2$                                                              |                                                                                                               | $112 \times 112$ |
|           | $3 \times 3, \text{max-pool, stride } 2$                                                        |                                                                                                               |                  |
| conv2_x   | $\begin{bmatrix} 1 \times 1, 64 \\ 3 \times 3, 64 \\ 1 \times 1, 256 \end{bmatrix} \times 3$    | $\begin{bmatrix} \text{TSM} \\ 1 \times 1, 64 \\ 3 \times 3, 64 \\ 1 \times 1, 256 \end{bmatrix} \times 3$    | $56 \times 56$   |
| conv3_x   | $\begin{bmatrix} 1 \times 1, 128 \\ 3 \times 3, 128 \\ 1 \times 1, 128 \end{bmatrix} \times 4$  | $\begin{bmatrix} \text{TSM} \\ 1 \times 1, 128 \\ 3 \times 3, 128 \\ 1 \times 1, 128 \end{bmatrix} \times 4$  | $28 \times 28$   |
| MS Module | $\times$                                                                                        | $\checkmark$                                                                                                  | $28 \times 28$   |
| conv4_x   | $\begin{bmatrix} 1 \times 1, 256 \\ 3 \times 3, 256 \\ 1 \times 1, 1024 \end{bmatrix} \times 6$ | $\begin{bmatrix} \text{TSM} \\ 1 \times 1, 256 \\ 3 \times 3, 256 \\ 1 \times 1, 1024 \end{bmatrix} \times 6$ | $14 \times 14$   |
| conv5_x   | $\begin{bmatrix} 1 \times 1, 512 \\ 3 \times 3, 512 \\ 1 \times 1, 2048 \end{bmatrix} \times 3$ | $\begin{bmatrix} \text{TSM} \\ 1 \times 1, 512 \\ 3 \times 3, 512 \\ 1 \times 1, 2048 \end{bmatrix} \times 3$ | $7 \times 7$     |

\*Equal supervision

It should be noted that our encoder definition is consistent with the architecture design introduced in ResNet [1] and is different from the encoder in the work of *MotionSqueeze* in [2] as shown in Table 1.

### 1.3. Evaluation Protocol.

We conduct evaluation on two datasets Kinetics-GEBD [5] and TAPOS [4]. For evaluation, we follow the standard evaluation protocol explained in [5], which uses the F1 score as the measurement metric. *Rel. Dis* (Relative Distance) is used to decide whether a detected event boundary is correct (if detection probability  $\geq 0.5$ ) or otherwise incorrect. More formally, *Rel. Dis* is defined as the error between detected and ground-truth timestamps, divided by the length of the whole video. F1 score calculated at *Rel. Dis* threshold 0.05 was used as the evaluation metric for the GEBD challenge<sup>1</sup>. We compare our detection results with all annotations (5 annotations per video for Kinetics-GEBD and 1 annotation for TAPOS) in the same video and select the annotation with the highest F1 score.

## References

- [1] Kaiming He, Xiangyu Zhang, Shaoqing Ren, and Jian Sun. Deep residual learning for image recognition. In *Proceedings of the IEEE conference on computer vision and pattern recognition*, pages 770–778, 2016.
- [2] Heeseung Kwon, Manjin Kim, Suha Kwak, and Minsu Cho. Motionsqueeze: Neural motion feature learning for video understanding. In *European Conference on Computer Vision*, pages 345–362. Springer, 2020.
- [3] Ji Lin, Chuang Gan, and Song Han. TSM: Temporal shift module for efficient video understanding. In *Proceedings of the IEEE/CVF International Conference on Computer Vision*, pages 7083–7093, 2019.
- [4] Dian Shao, Yue Zhao, Bo Dai, and Dahua Lin. Intra- and inter-action understanding via temporal action parsing. In *Proceedings of the IEEE/CVF Conference on Computer Vision and Pattern Recognition (CVPR)*, June 2020.

<sup>1</sup>LOVEU@CVPR2021, LOVEU@CVPR2022

- [5] Mike Zheng Shou, Stan W Lei, Weiyao Wang, Deepti Ghadyaram, and Matt Feiszli. Generic event boundary detection: A benchmark for event segmentation. *arXiv preprint arXiv:2101.10511*, 2021.
